# Supplementary material for: Elucidating the role of dopants in the critical current density for dendrite formation in garnet electrolytes
Source: Royal Society of Chemistry journal article supplement (doi:10.1039/c8ta08366e), 2018-01-01
Supplement: c8ta08366e1.pdf [file c8ta08366e1.pdf]

## Supplementary Information

### ***Elucidating the Role of Dopants on the Critical Current Density for Dendrites Formation in Garnet Electrolytes***

Federico M. Pesci,<sup>a\*</sup> Rowena H. Brugge,<sup>a</sup> A. K. Ola Hekselman,<sup>a</sup> Andrea Cavallaro,<sup>a</sup> Richard J. Chater<sup>a</sup>  
and Ainara Aguadero<sup>a\*</sup>

<sup>a</sup> Department of Materials, Imperial College London, Exhibition Road, SW7 2AZ, London, UK

E-mail: f.pesci@imperial.ac.uk, a.aguadero@imperial.ac.uk

#### ***S1. ICP results***

*Table S1: ICP results for Al- and Ga-doped LLZO showing Li, Al and Ga concentrations. The Zr concentration was fixed to 2 whereas the La concentration could not be detected due to ppm values greater than the ICP limits. The numbers in brackets represent the standard deviation of the six measurements recorded for each element. It is also important to note that the higher content of aluminium is due to Al contaminations as a result of sintering in Al<sub>2</sub>O<sub>3</sub> crucibles.*

|                | <i>Li</i>   | <i>Al</i>     | <i>Ga</i>     | <i>Zr</i> |
|----------------|-------------|---------------|---------------|-----------|
| <i>Al-LLZO</i> | 6.53 (0.05) | 0.276 (0.008) | -             | 2.000     |
| <i>Ga-LLZO</i> | 6.4 (0.2)   | 0.09 (0.02)   | 0.160 (0.005) | 2.000     |

## S2. Repeated electrochemical measurements

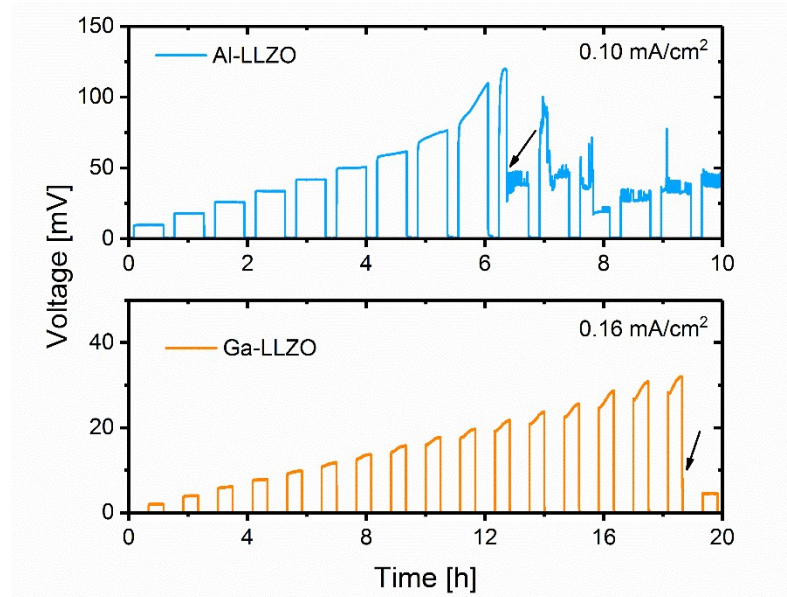

| Al-LLZO<br>Sample ID   | Time at 0.10 mA/cm <sup>2</sup><br>before short circuit | Ga-LLZO<br>Sample ID   | Time at 0.16 mA/cm <sup>2</sup><br>before short circuit |
|------------------------|---------------------------------------------------------|------------------------|---------------------------------------------------------|
| Al-LLZO-07-A (1.02 mm) | 23 minutes                                              | Ga-LLZO-02-B (1.01 mm) | 28 minutes                                              |
| Al-LLZO-07-D (0.89 mm) | 11 minutes                                              | Ga-LLZO-02-D (0.98 mm) | 18 minutes                                              |
| Al-LLZO-08-B (0.98 mm) | 22 minutes                                              | Ga-LLZO-04-A (1.0 mm)  | 21 minutes                                              |
| Al-LLZO-08-E (0.91 mm) | 16 minutes                                              | Ga-LLZO-04-C (0.98 mm) | 17 minutes                                              |
| Al-LLZO-11-B (0.96 mm) | 20 minutes                                              |                        |                                                         |

Figure S1: Li plating graph for Al-LLZO (blue line) and Ga-LLZO (orange line). The arrow in the figure indicate the moment in which short circuit occurs. Times at which short circuit occurs for different cells are reported in the table.

## S3. XRD of post-cycling samples

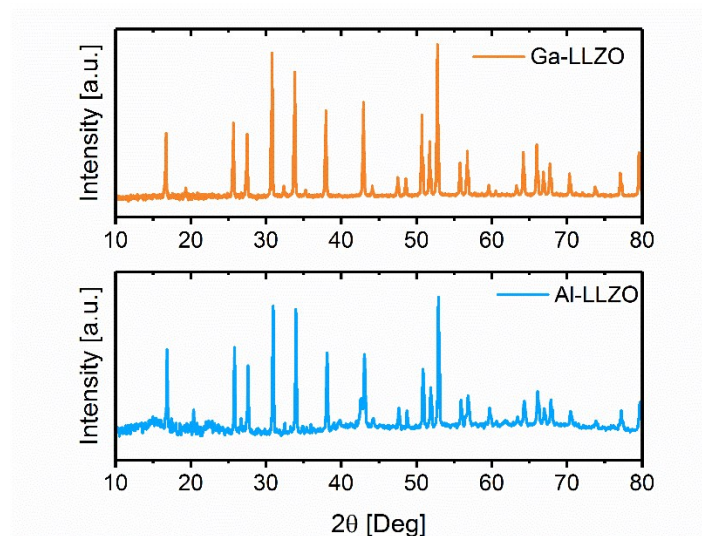

Figure S2: Post-cycling XRD patterns of Ga-LLZO (orange line) and Al-LLZO (blue line).

#### S4. Cross sectional SEM micrographs of Ga-LLZO

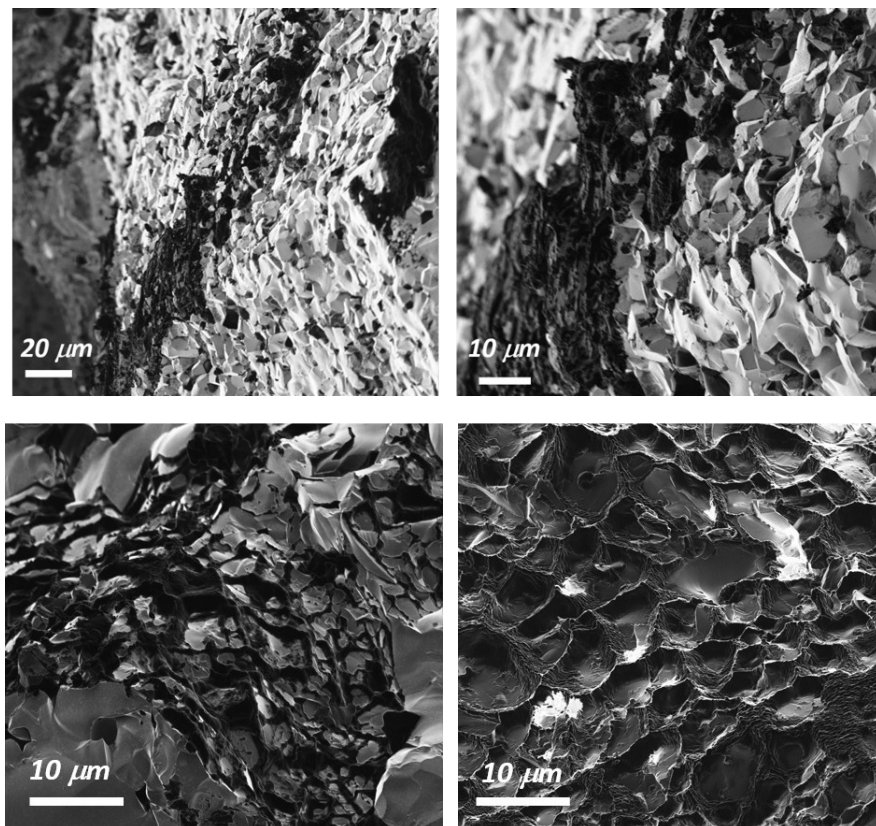

Figure S3: (Top) Cross sectional SEM micrographs of a cycled Ga-LLZO pellet showing a web-like dendritic feature across the pellet and (bottom) higher magnification micrographs of the dendritic feature reported in figure 7f.

#### S5. Extended cycling at lower currents

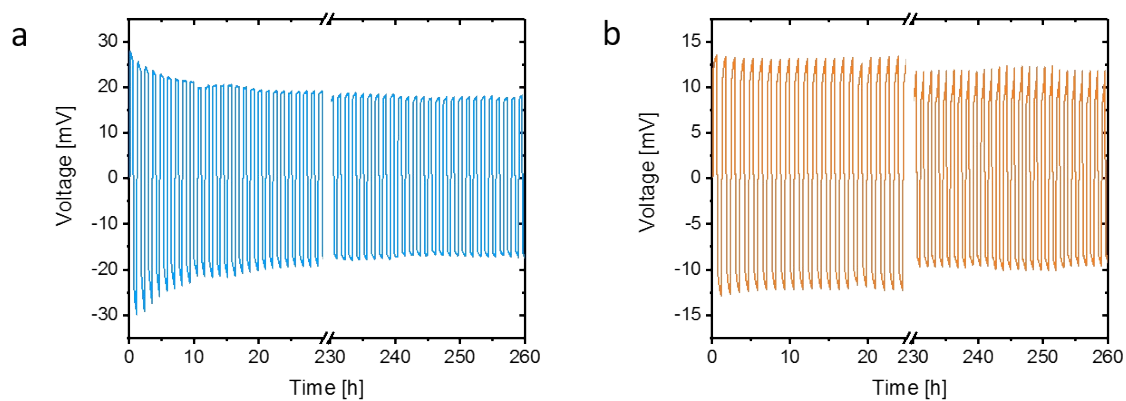

Figure S4. Extended electrochemical cycling carried out on (a) Al-LLZO and (b) Ga-LLZO at a current density of  $0.08\text{mA}/\text{cm}^2$  and  $0.14\text{mA}/\text{cm}^2$ , respectively.

## S6. EDX analysis on Al-LLZO Dendritic Features

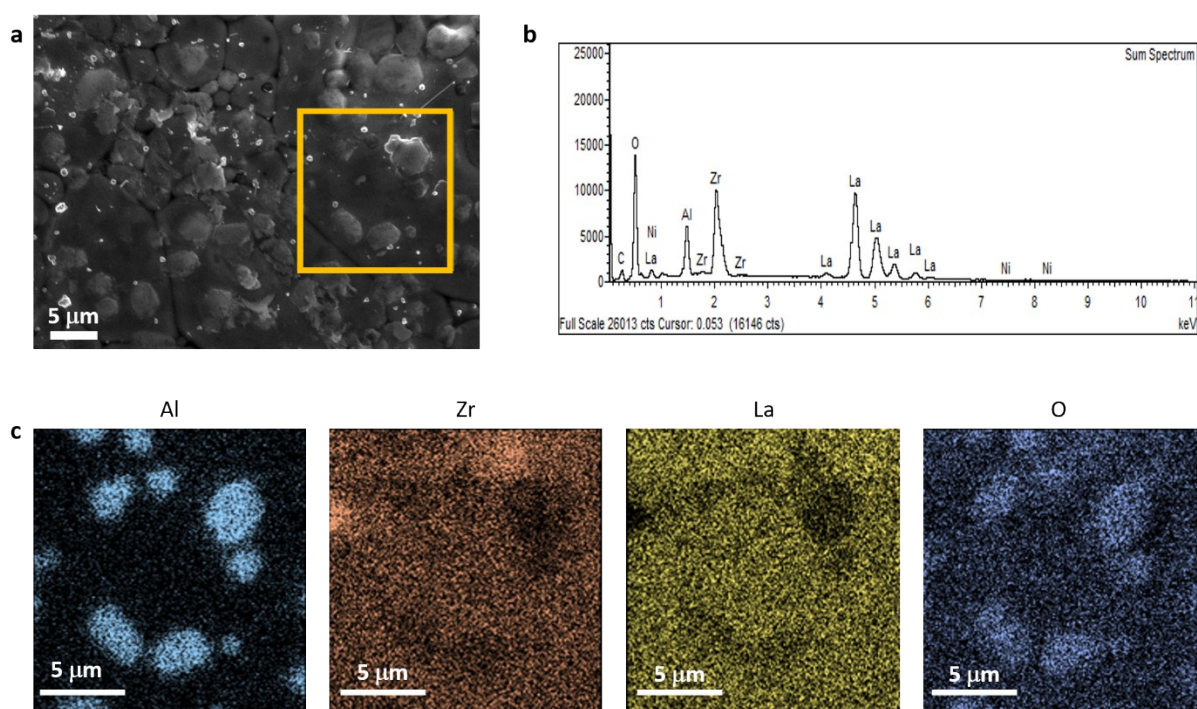

Figure S5: EDX analysis on Al-LLZO dendritic features. a) SEM micrograph of a cycled Al-LLZO, b) EDX spectrum and c) EDX elemental maps for Al, Zr, La and O.

## S7. Stability of Li/Al-LLZO/Li prior to electrochemical cycling

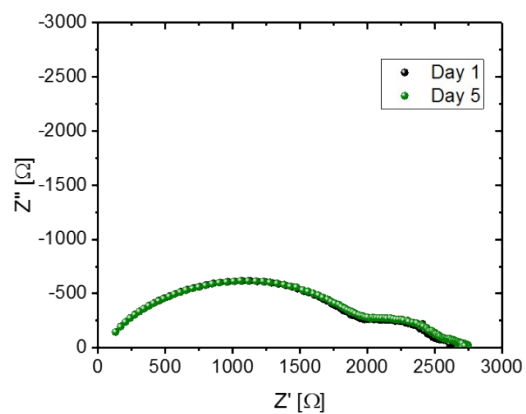

Figure S6: EIS spectra recorded for Al-doped LLZO at an interval of five days
